# Supplementary material for: Digital Image Analysis of Picrosirius Red Staining: A Robust Method for Multi-Organ Fibrosis Quantification and Characterization
Source: MDPI journal article supplement (doi:10.3390/biom10111585), 2020-11-22

Supplementary Material 2: Detection filters and threshold determination for the RGB-based or the PSR-optimized methods. An illustration is given in the liver.

*Raw image*

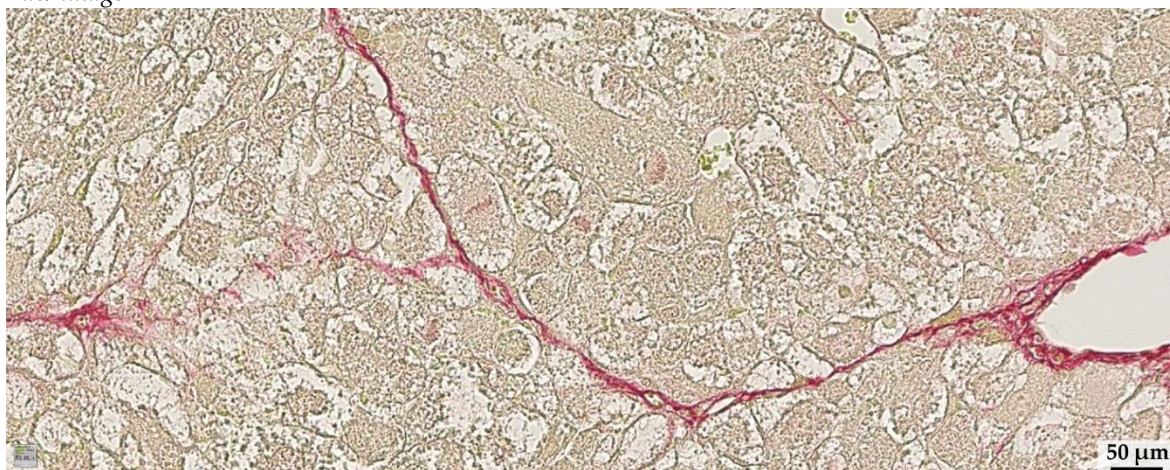

## **A. RGB-based method**

### ***1. Detection filter (RGB-G)***

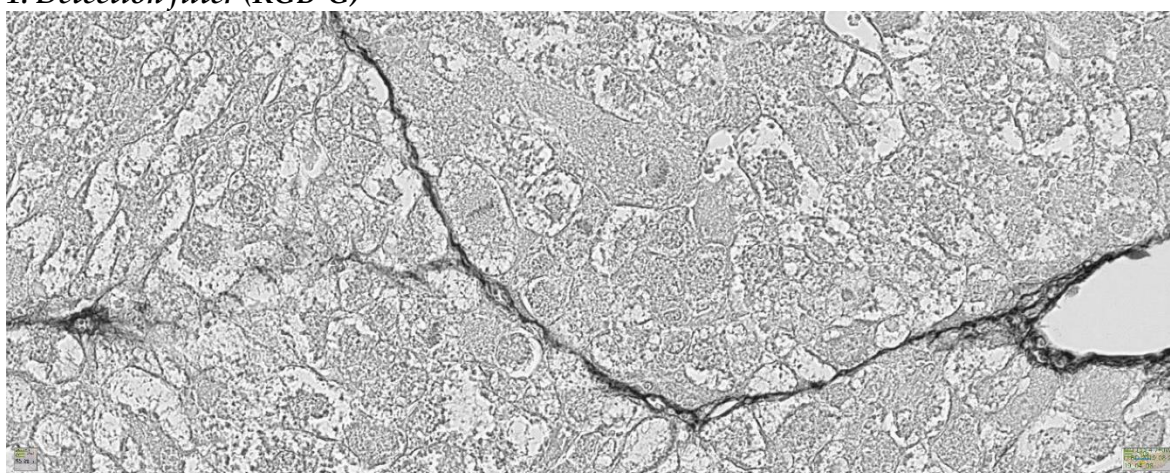

### ***2. Result with RGB-based method***

Threshold set to best fit all organs (=85). Note the presence of aspecific and undetected pixels.

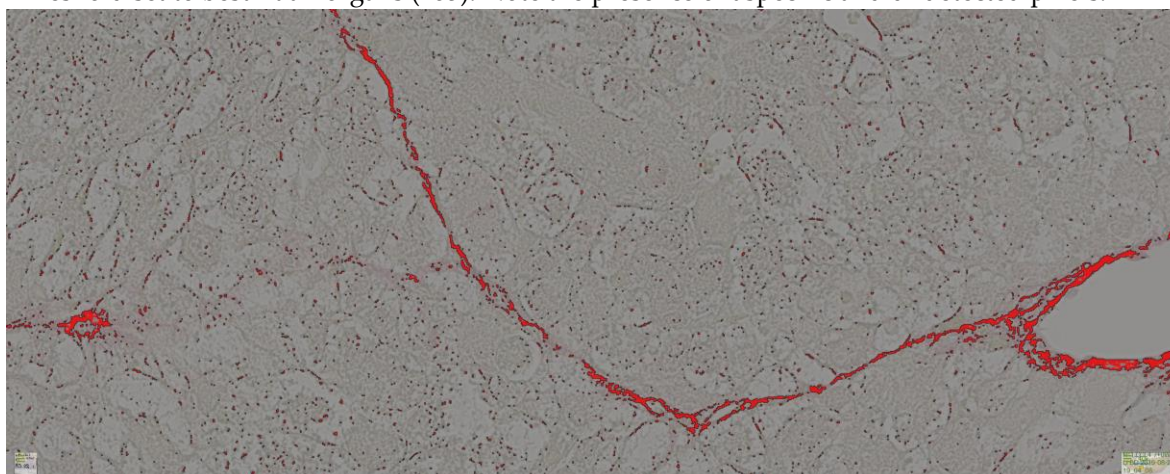



## B. Optimized method

### 1. Pre-filters

a) RGB-G (mean)

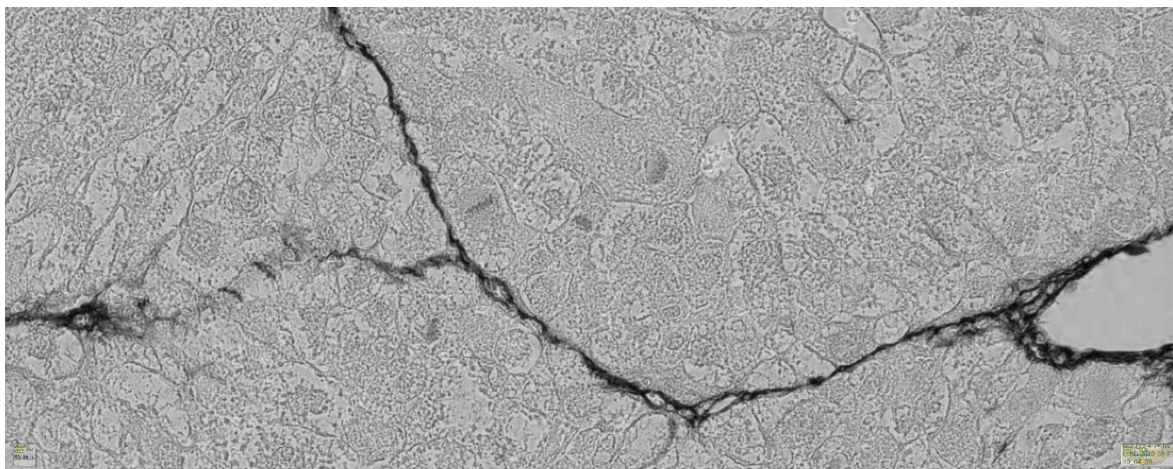

b) Hematoxylin / 3-Amino-9-Ethylcarbazole (H-AEC)

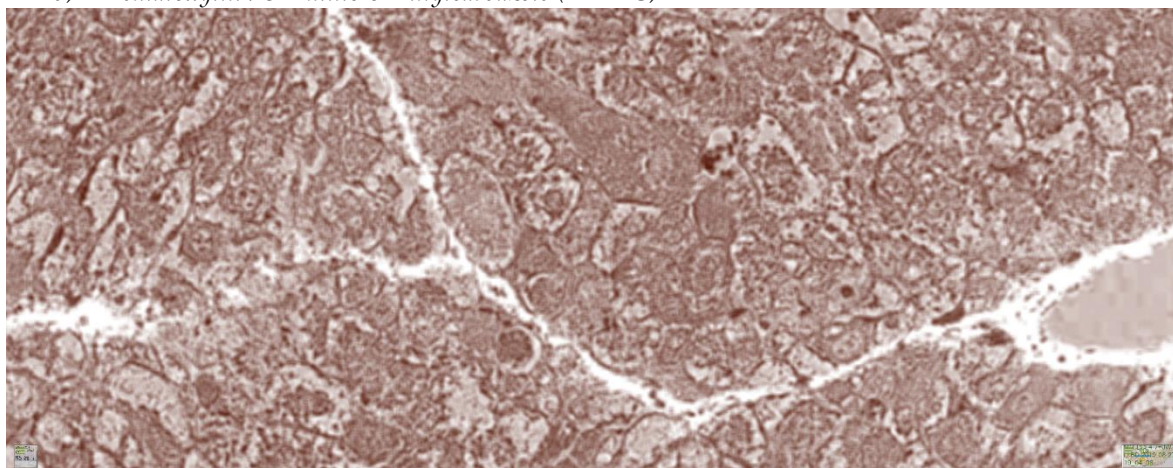

c) H-AEC divided by RGB-G (mean); noise filter

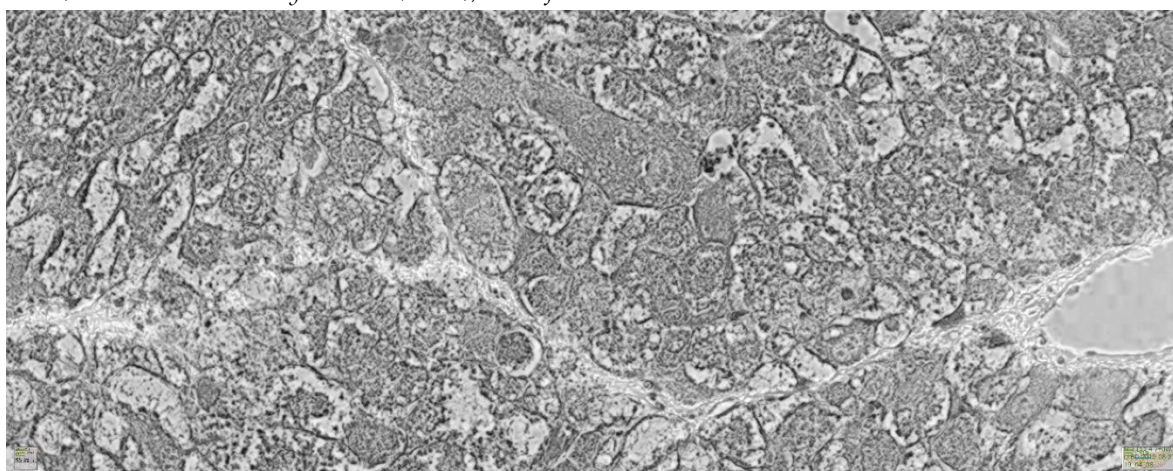



## 2. Detection filters

### a) Red-Green Contrast filter minus noise filter

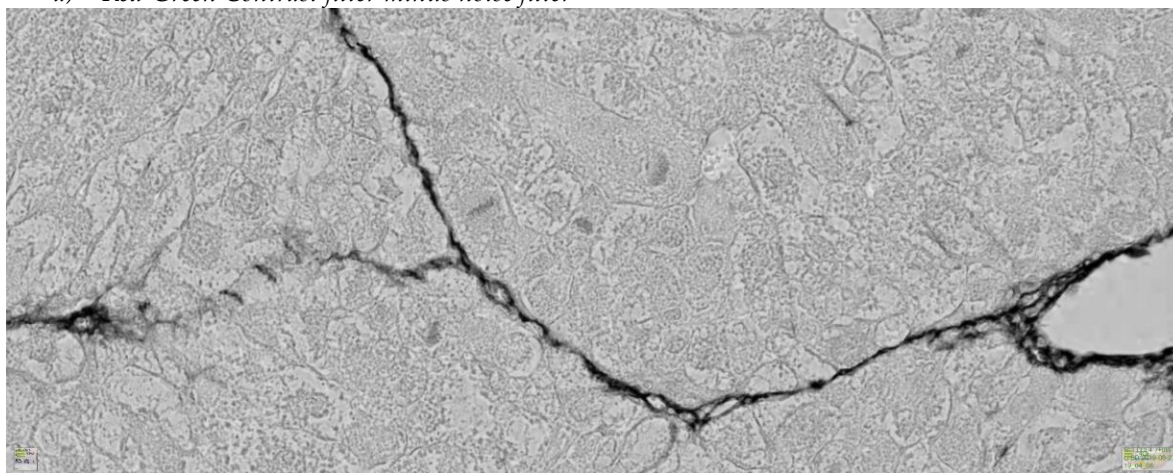

### b) Chromaticity Red

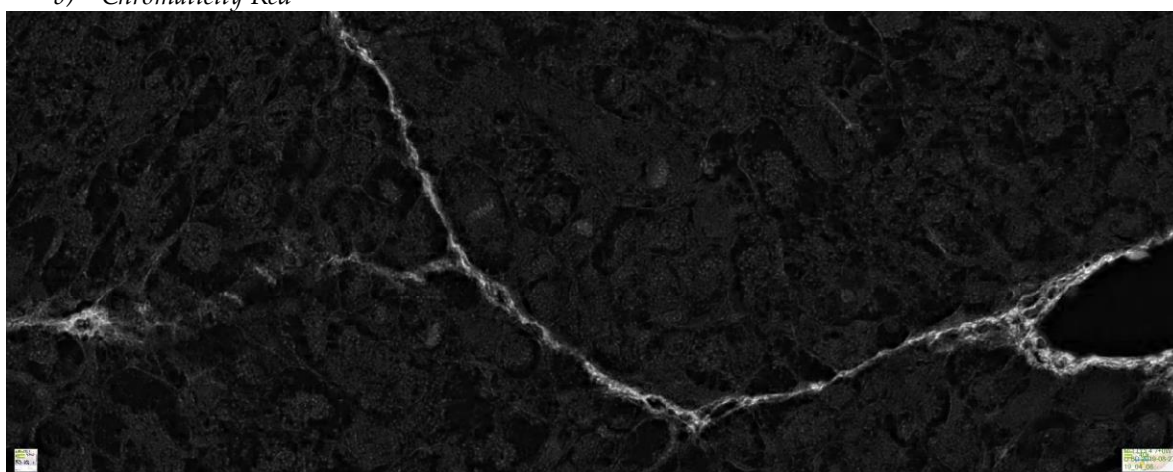

## 3. Result with PSR optimized method

Threshold set to best fit all organs (= 90). Note the good sensitivity (correct detection of faintly stained pixels) and specificity (no unstained pixel included) with these parameters. An example is given in the three studied organs in [Supplement material 3](#). If needed, threshold can easily be adjusted per organ according to specific background. See below the great dynamic range of this method.

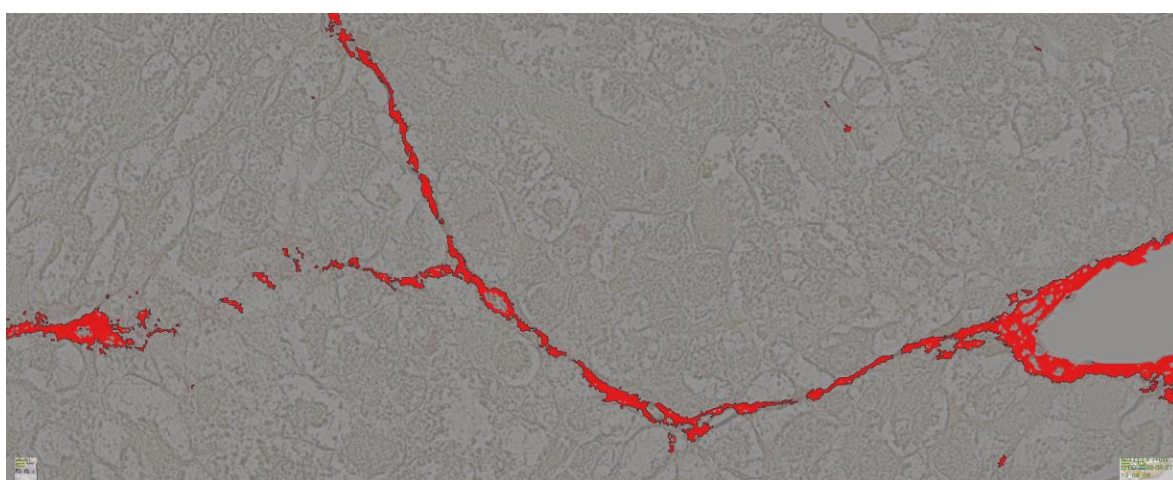

#### 4. PSR optimized method: subsequent fiber classification

Having detected PSR staining, subsequent segmentation was achieved by watershed (Chromaticity red used as reference) and separate objects functions (size). Each segment was classified as *scattered fibers* (blue) or *compact fibers* (red) based on the mean intensity.

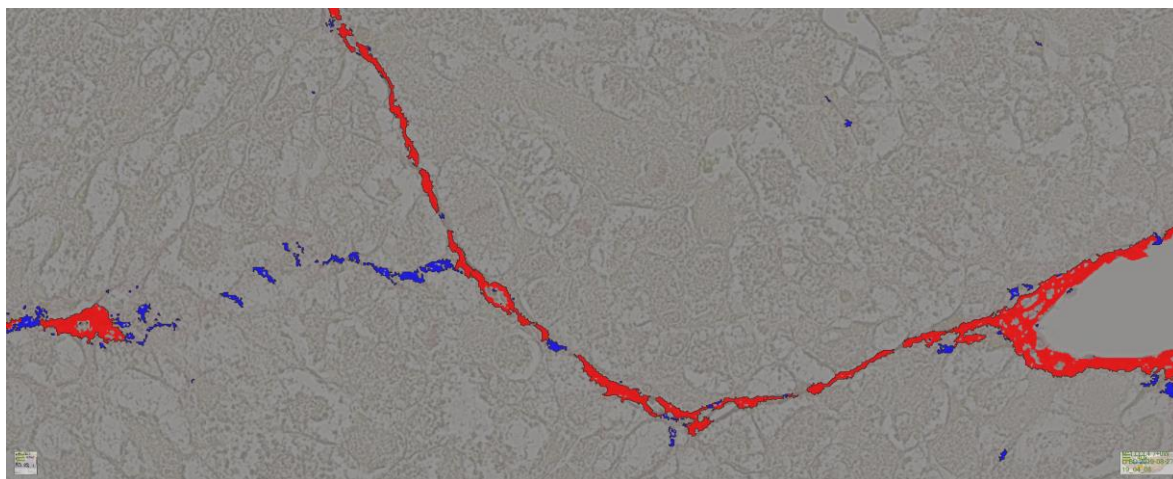



### C. Dynamic range of the two detection methods

#### *A. RGB method*

*threshold = 5*

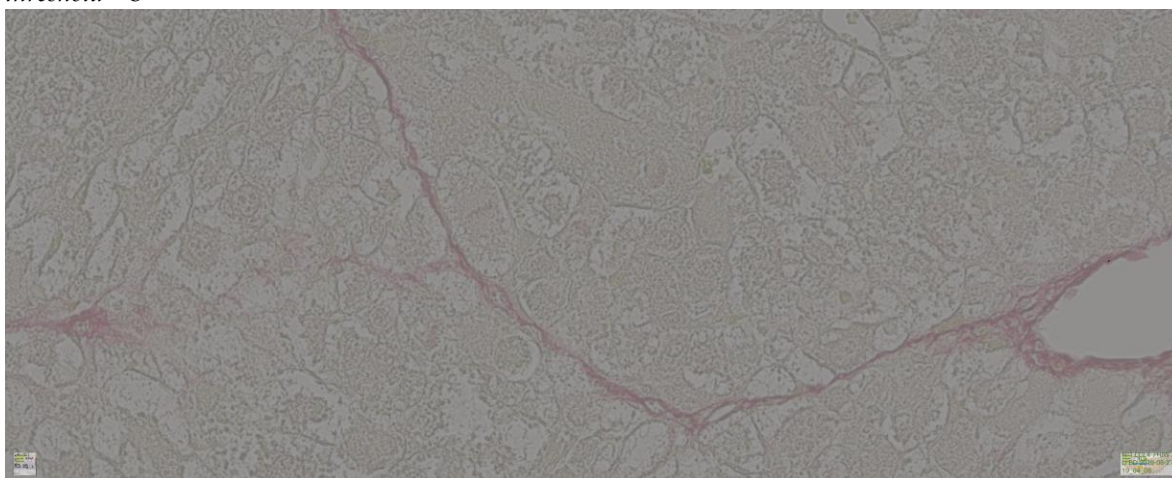

*threshold = 20*

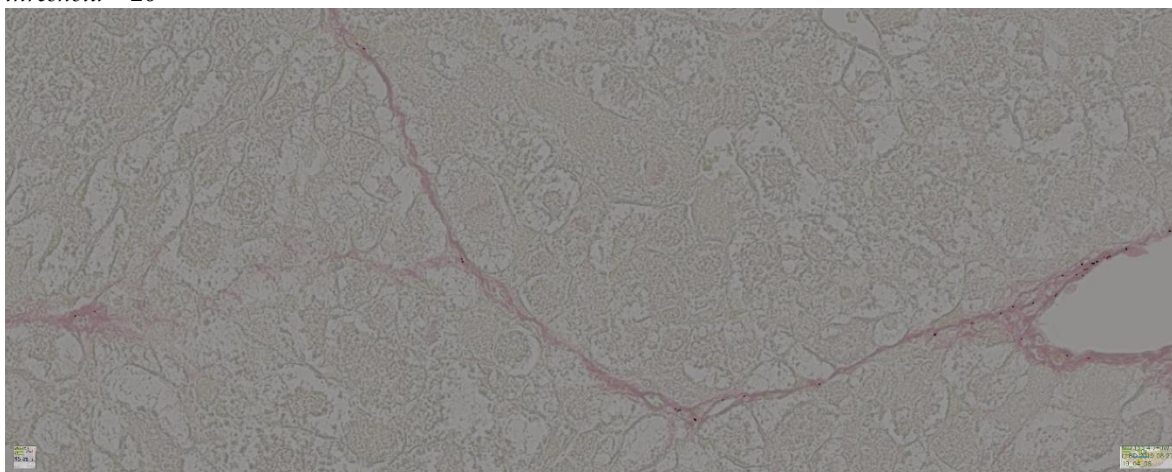

*threshold = 40*

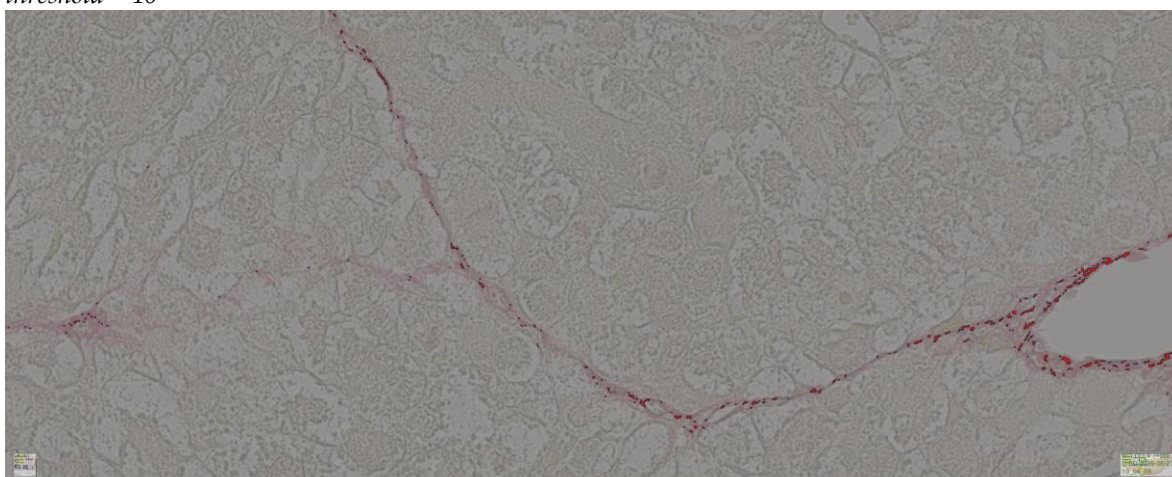

47 *threshold = 50*

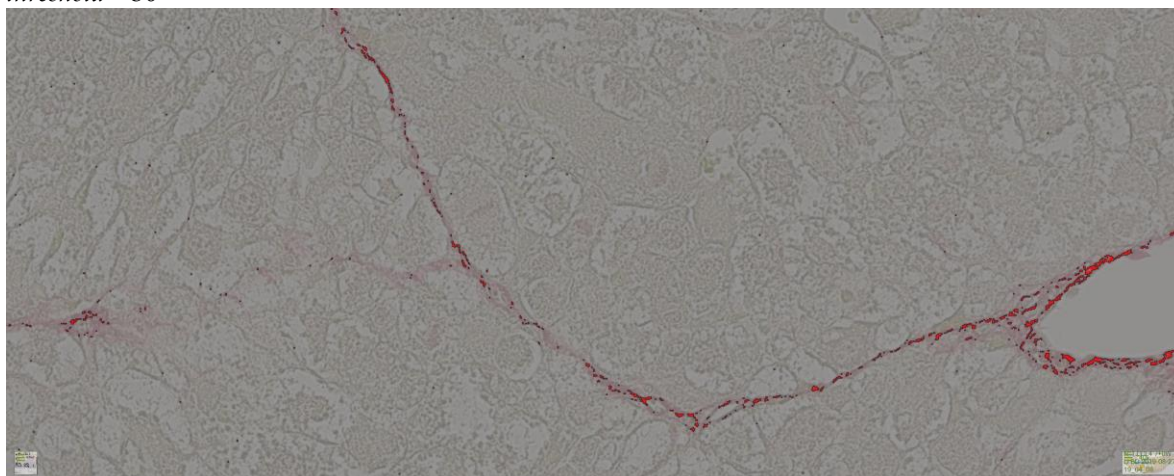

48  
49 *threshold = 60*

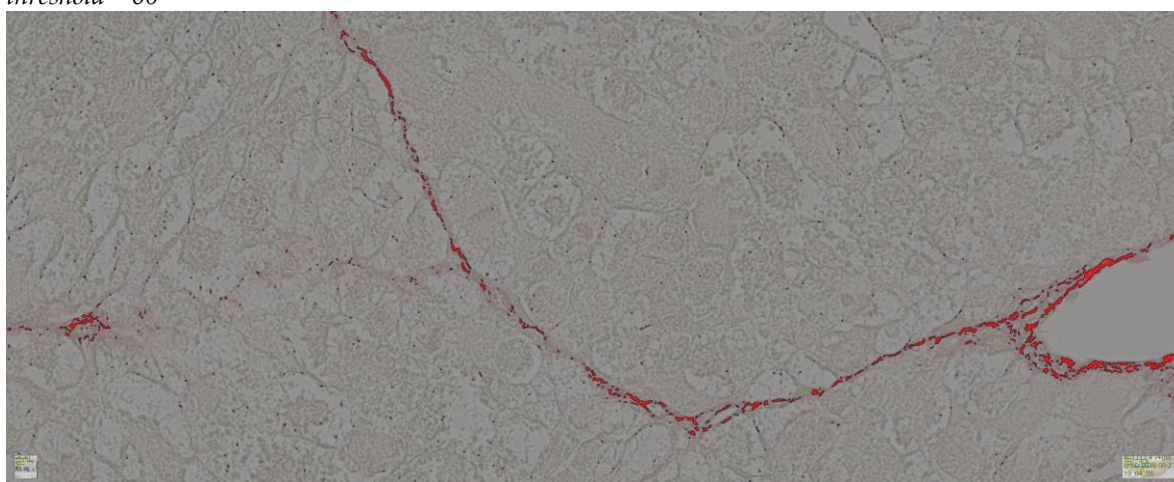

50  
51 *threshold = 70*

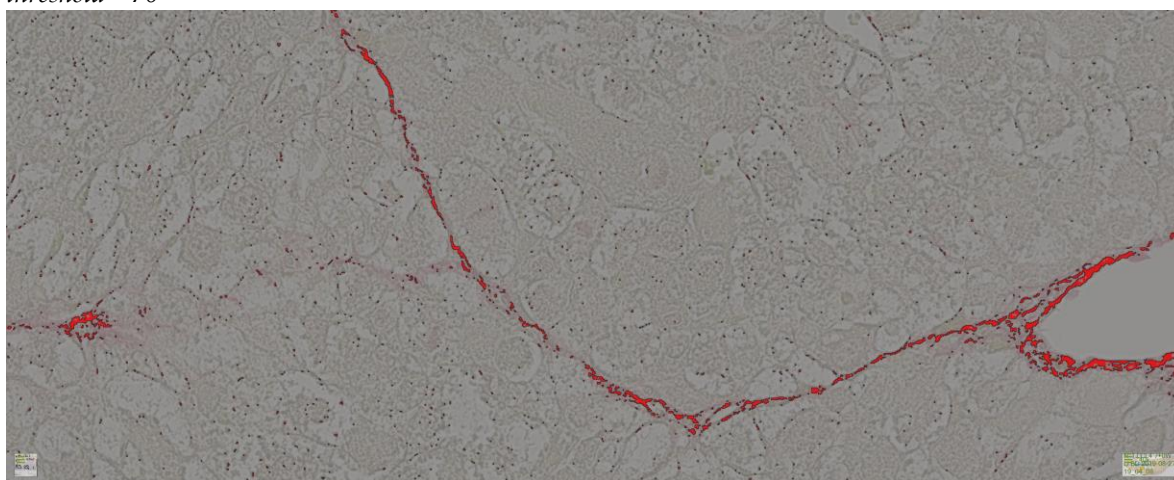

52  
53



54 *threshold = 80*

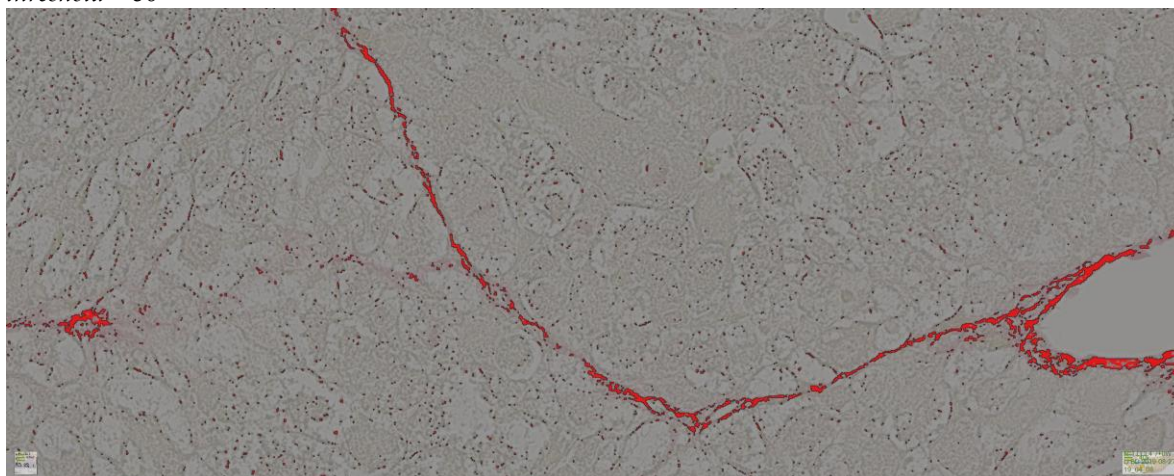

55  
56 *threshold = 85 (chosen for multi-organ comparison, [Supplement material 3](#))*

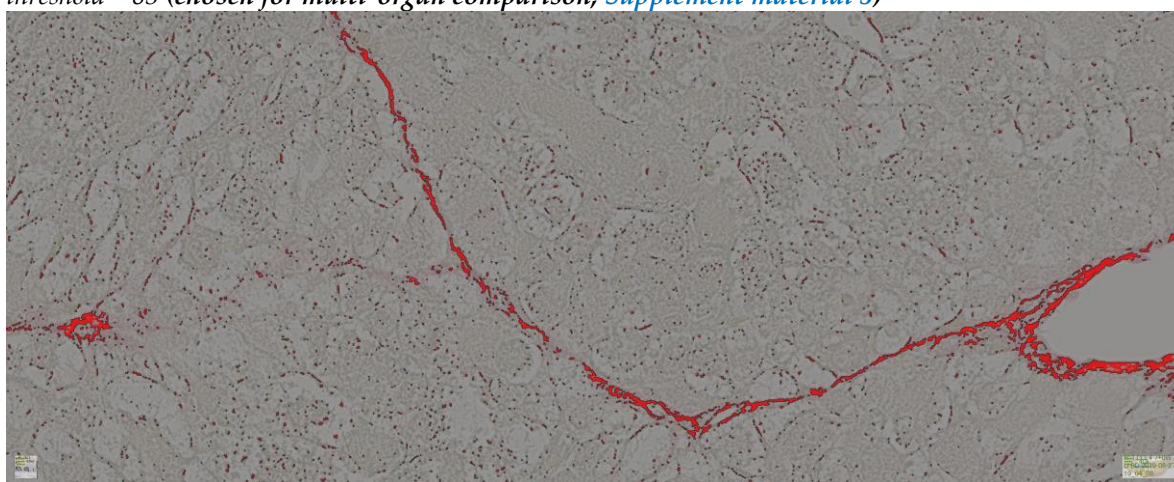

57  
58 *threshold = 90*

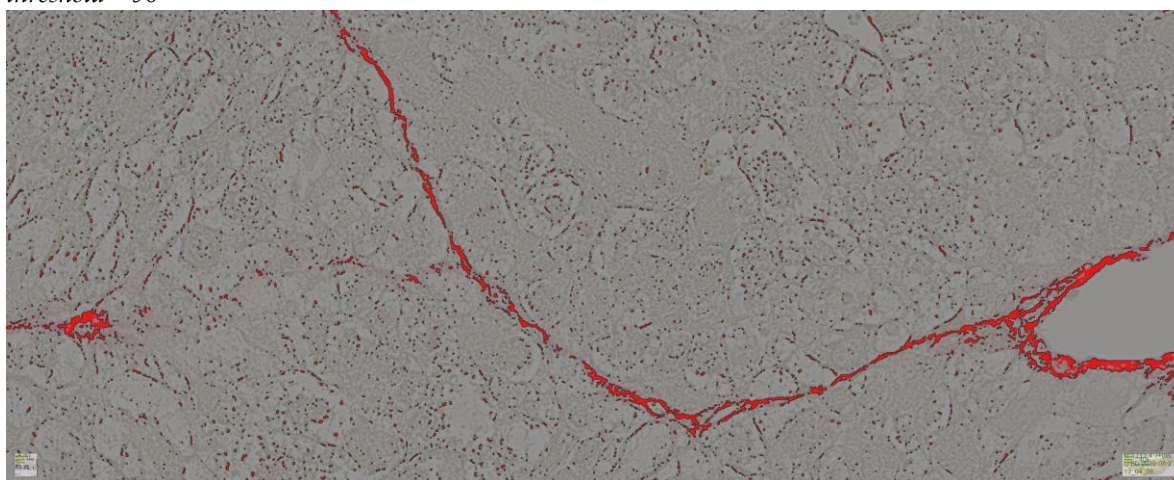

59



60 *threshold = 100*

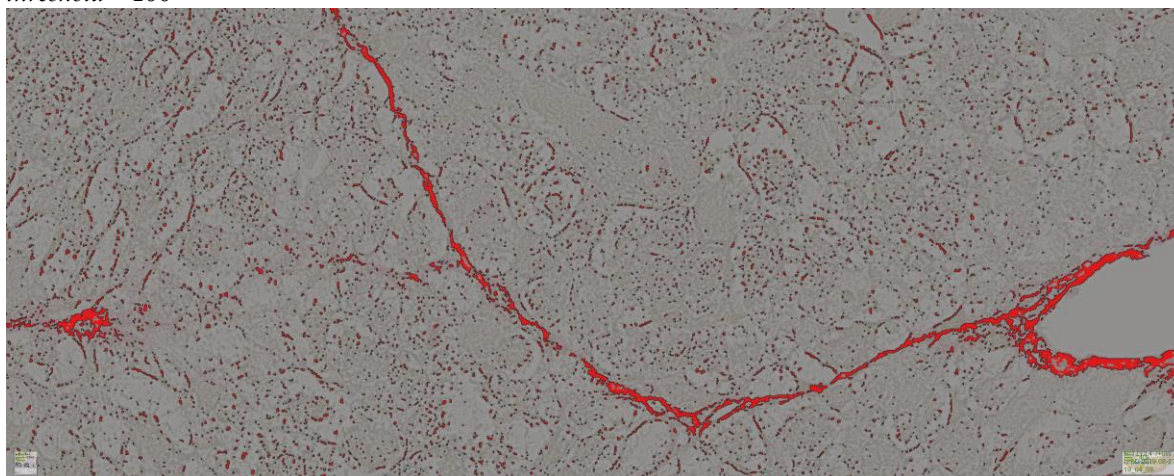

61  
62 *threshold = 120*

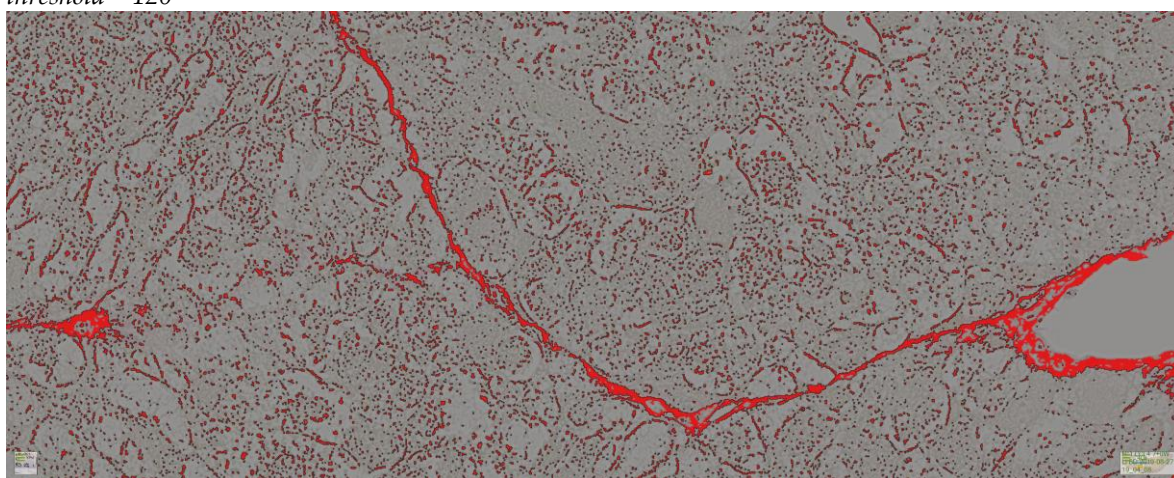

63  
64 *threshold = 140*

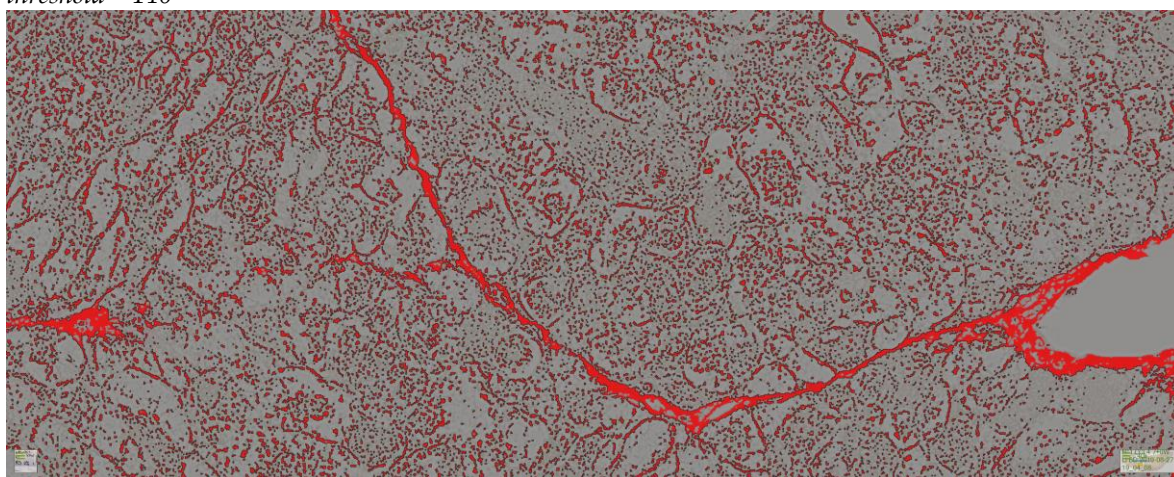

65



**B. PSR optimized method***threshold = -20*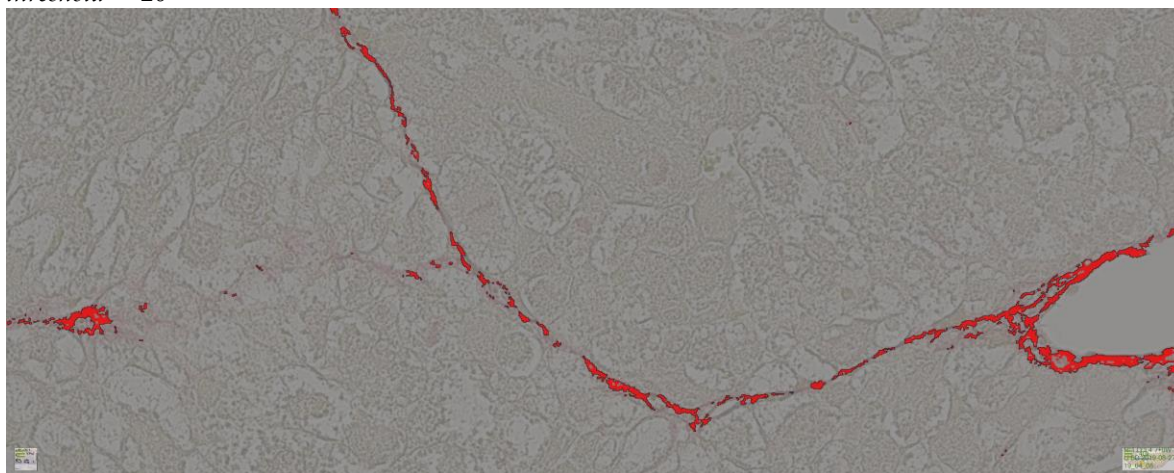*threshold = 0*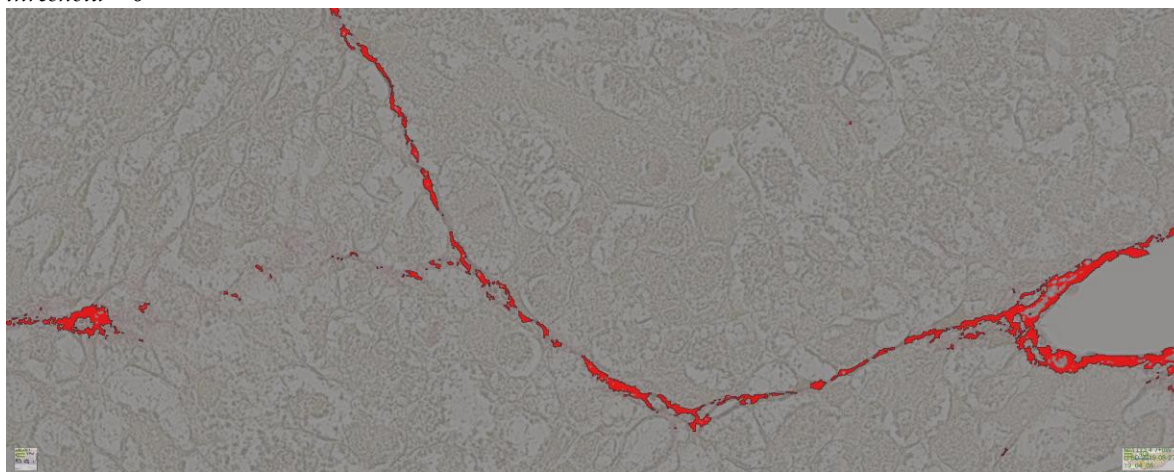*threshold = 20*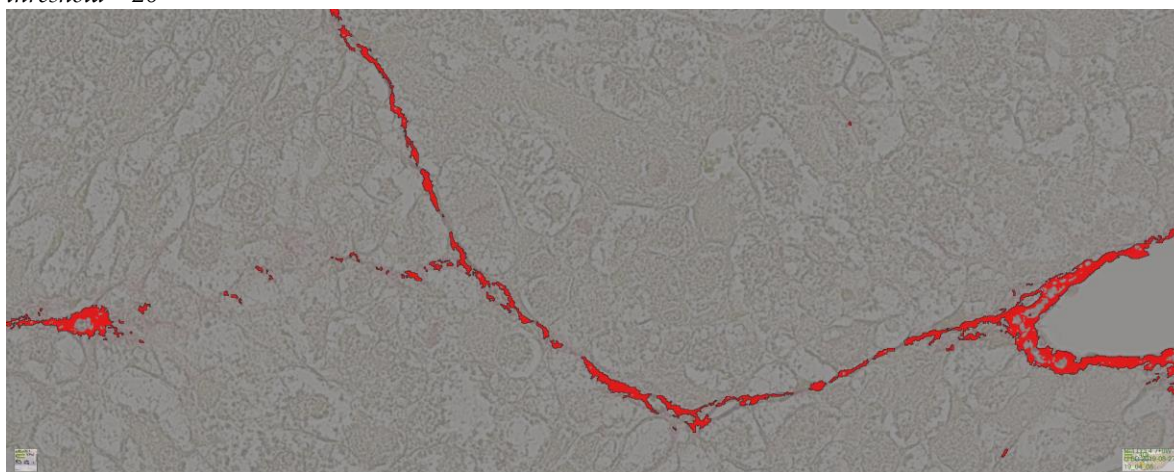



73 threshold = 30

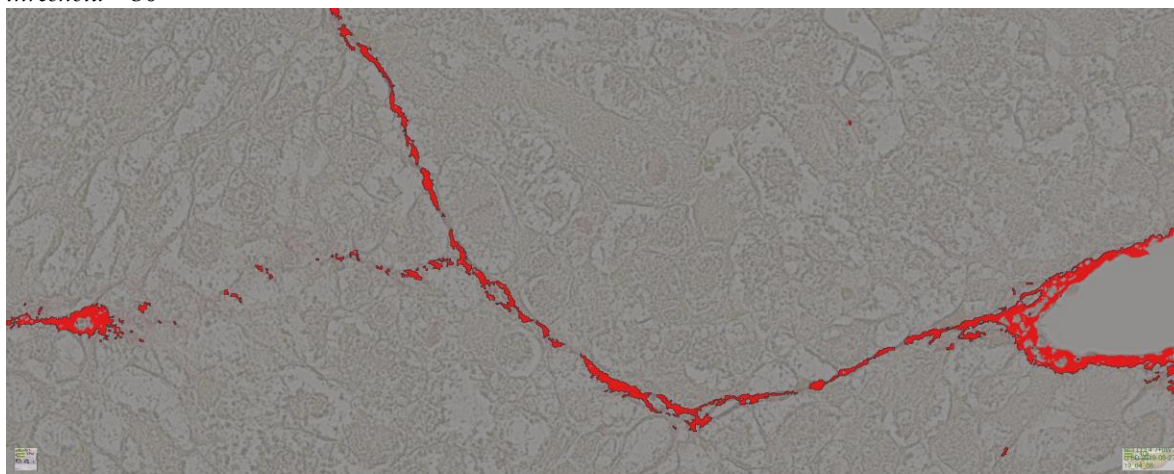

74 threshold = 40  
75

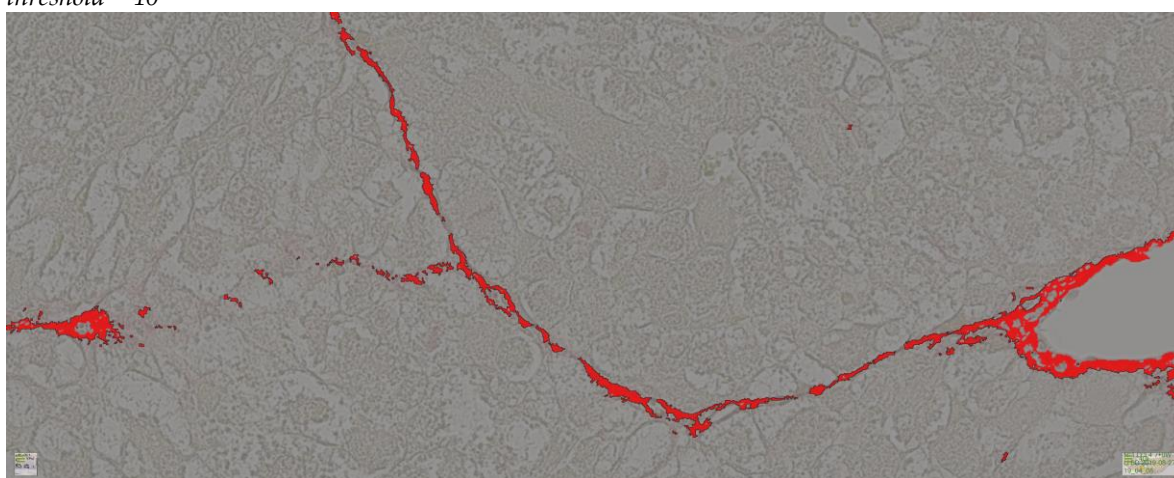

76 threshold = 50  
77

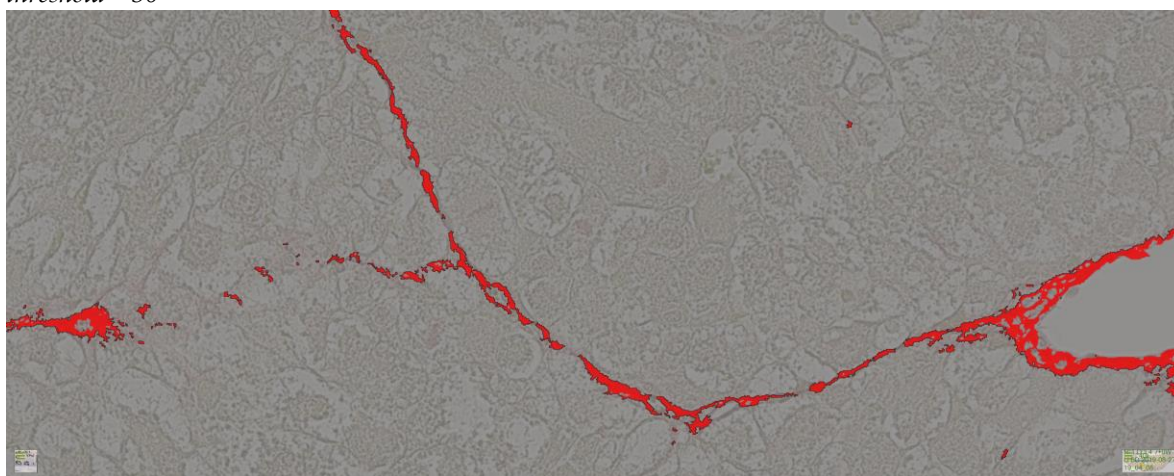

78  
79



80 *threshold = 60*

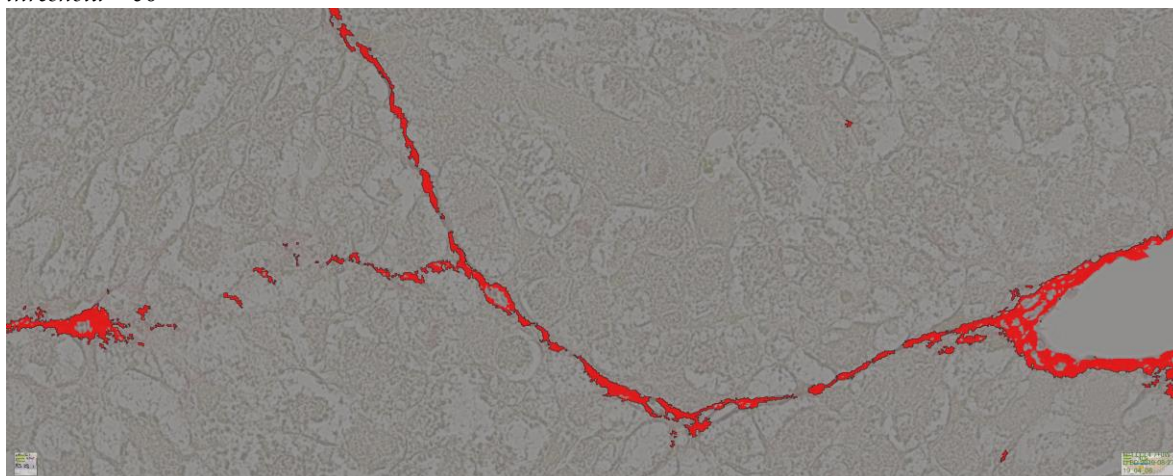

81  
82 *threshold = 70*

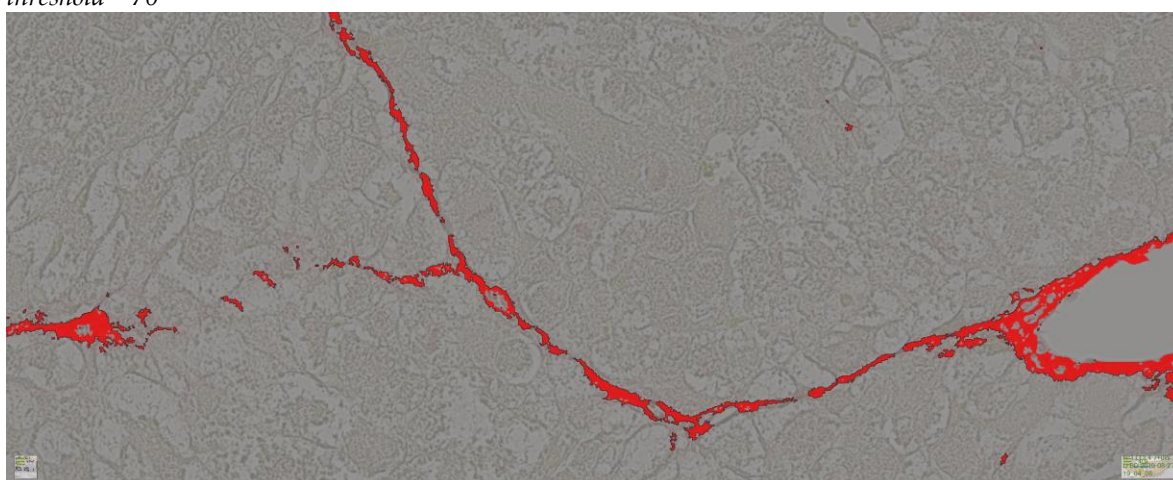

83  
84 *threshold = 80*

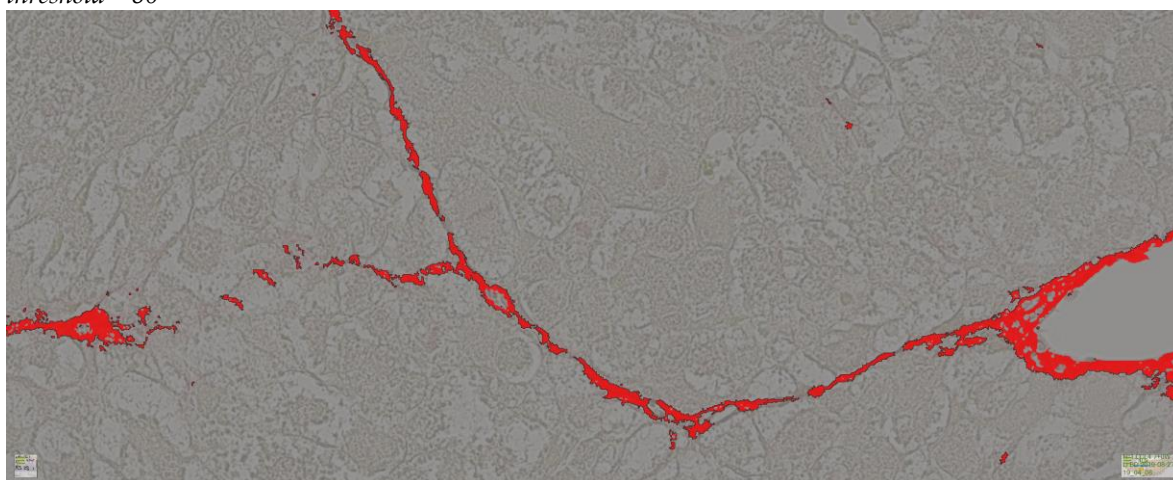

85  
86



87 threshold = 90 (chosen for multi-organ comparison, [Supplement material 3](#))

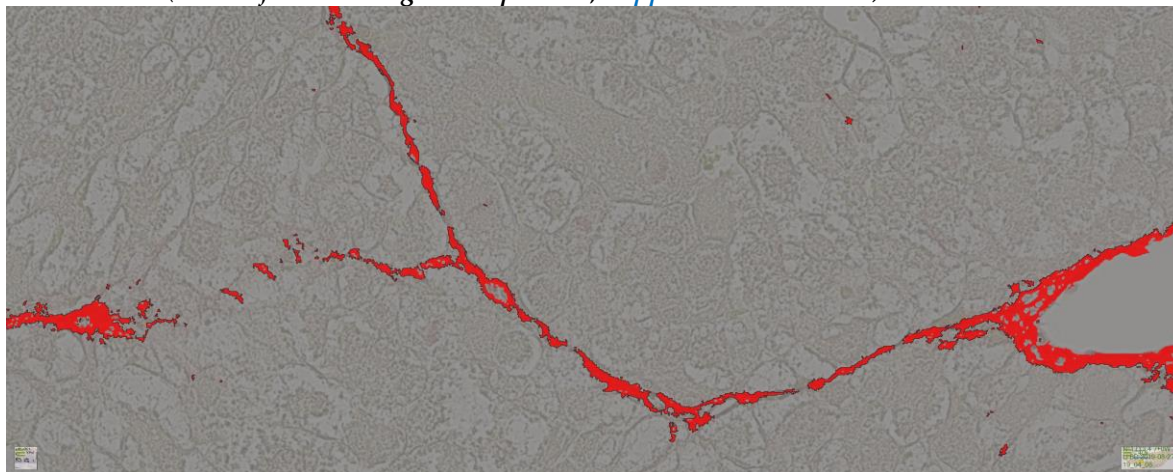

88  
89 threshold = 100

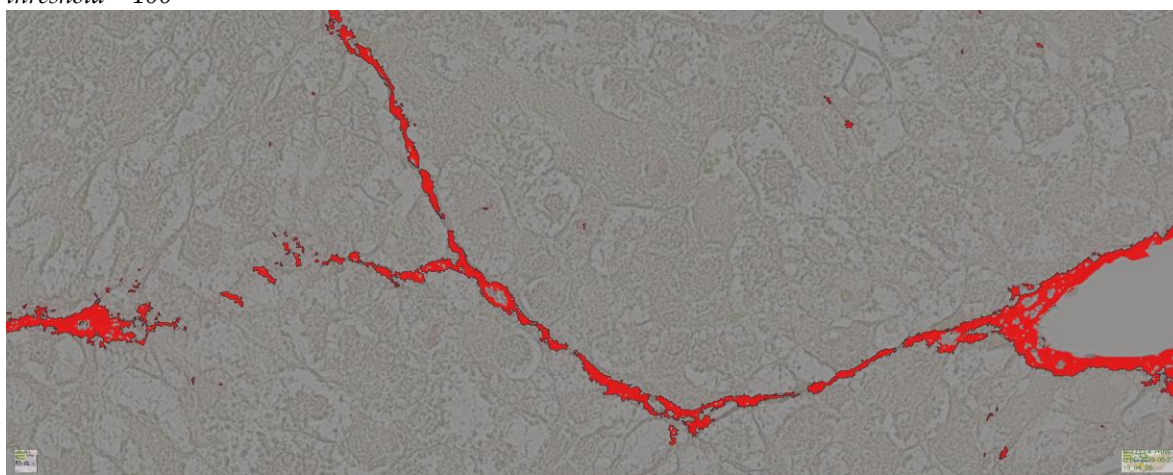

90  
91 threshold = 110

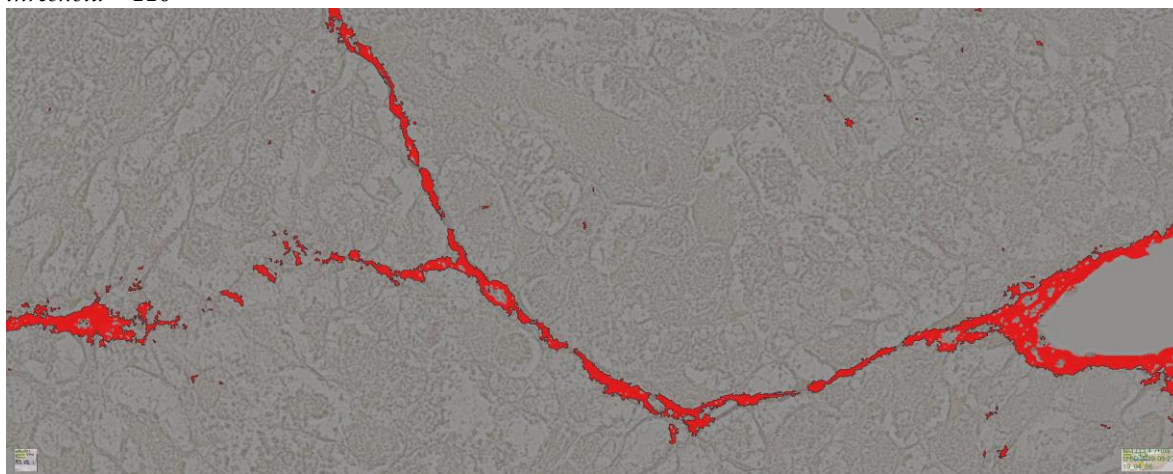

92



93 *threshold = 120*

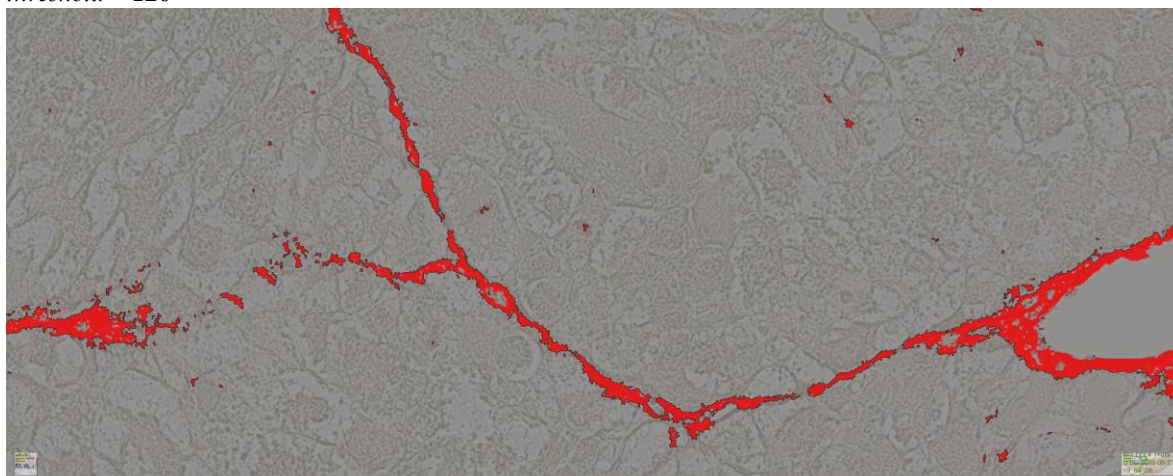

94  
95 *threshold = 130*

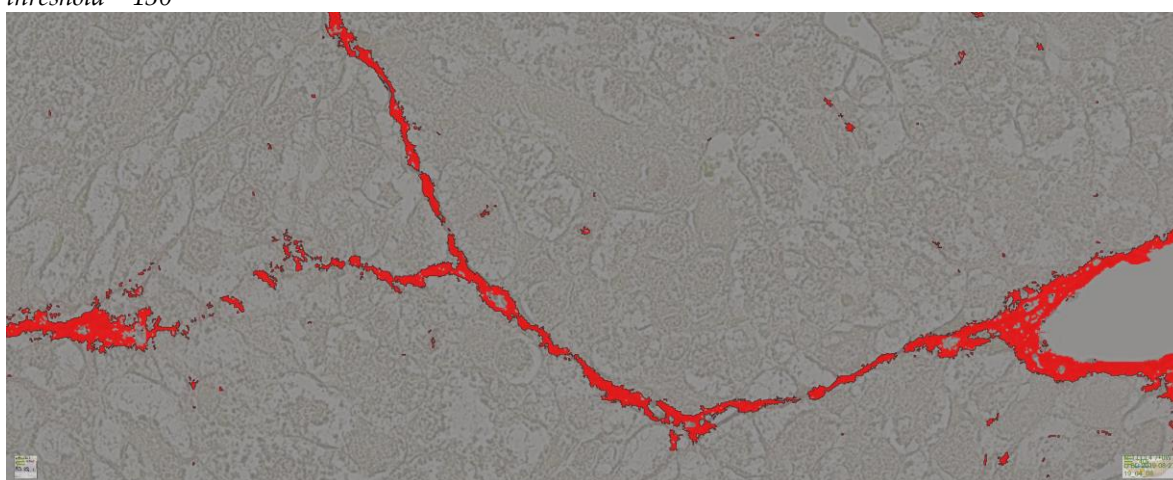

96  
97 *threshold = 140*

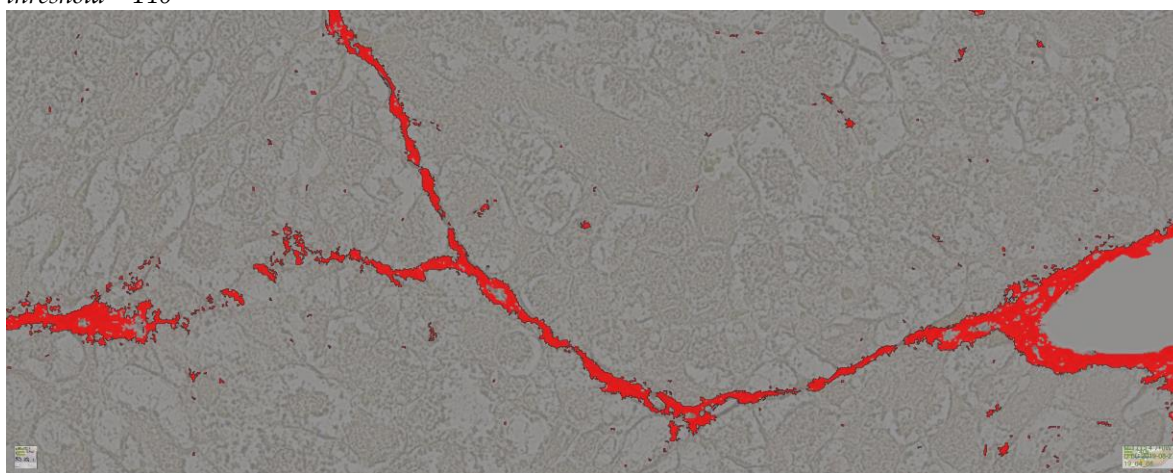

98



#### D. Comparison of the detection methods

An example is given for the detection of discrete liver fibrosis. Signal is either detected using the  $PSR_{RGB}$  or the  $PSR_{OPT}$  filtering. Using a common threshold defined to best fit all organs,  $PSR_{RGB}$  provided incomplete (yellow arrow) or irrelevant results (white arrow) (B). The accuracy of detection was improved with  $PSR_{OPT}$  method (C). Based on  $PSR_{OPT}$  detection method, it was possible to segment the fibers and to apply an automated classification based on the staining intensity and pixel homogeneity (D).

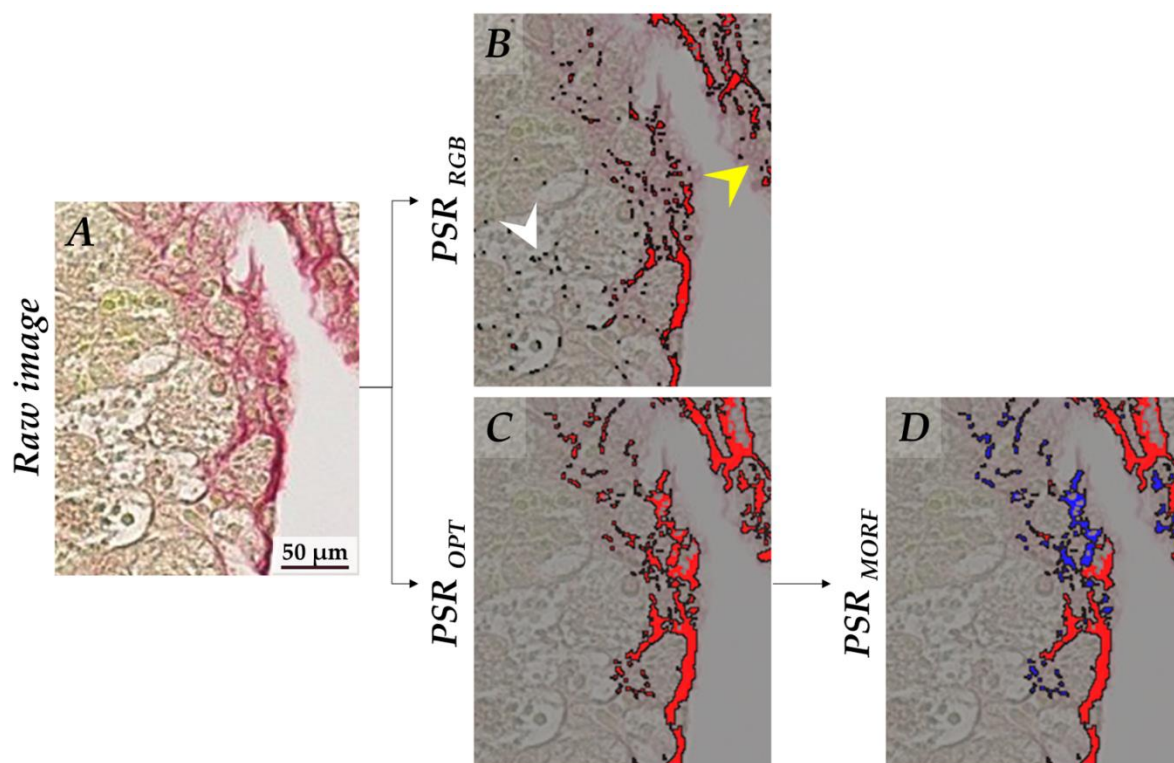

Supplement: s1 [file s1]
