# Supplementary material for: Digital Image Analysis of Picrosirius Red Staining: A Robust Method for Multi-Organ Fibrosis Quantification and Characterization
Source: Biomolecules. 2020 Nov 22;10(11):1585. doi: 10.3390/biom10111585 (PMC7709042; doi:10.3390/biom10111585)
Supplement: Supplementary file 1 [file biomolecules-10-01585-s001.zip]

Archive with 4 entries (4 files):
- Courtoy et al. Supplementary Material 1.pdf
- Courtoy et al. Supplementary Material 2.pdf
- Courtoy et al. Supplementary Material 3.pdf
- Courtoy et al. Supplementary Material 4.pdf
